# Supplementary material
Source: ML conference proceedings conference paper supplement (https://openaccess.thecvf.com/content/ACCV2022/html/Dai_Cluster_Contrast_for_ACCV_2022_paper.html)
Supplement: Supplementary file 1 [file Dai_Cluster_Contrast_for_ACCV_2022_supplemental.pdf]

# Cluster Contrast for Unsupervised Person Re-Identification

Zuozhuo Dai<sup>1</sup>, Guangyuan Wang<sup>1</sup>, Weihao Yuan<sup>1</sup>, Siyu Zhu<sup>1</sup>, and Ping Tan<sup>2</sup>

<sup>1</sup> Alibaba Cloud

<sup>2</sup> Simon Fraser University

## 1 Appendix

The Cluster Contrast is simple and effective. It can be used together with existing unsupervised re-ID methods to further improve their performances. In this section, we demonstrate the generalization ability of Cluster Contrast by applying it on existing methods. For example, the Cluster Contrast can be used with the Generalized Mean Pooling (GeM) [3] to further improve the purely unsupervised re-ID performance. In unsupervised domain adaptation re-ID, the cluster contrast further boosts the SpCL’s performance. In particular, With additional camera ID information, the Cluster Contrast with CAP [4] outperforms all SOTA unsupervised re-ID methods.

Table 1: The Cluster Contrast further boosts the existing purely unsupervised re-ID, unsupervised domain adaptation and camera-aware unsupervised re-ID methods

| Method                                | Market-1501 |      |       |      |        | MSMT17 |      |       |       |       |
|---------------------------------------|-------------|------|-------|------|--------|--------|------|-------|-------|-------|
|                                       | source      | mAP  | top-1 | top5 | top 10 | source | mAP  | top-1 | top-5 | top10 |
| <b>Purely Unsupervised</b>            |             |      |       |      |        |        |      |       |       |       |
| Cluster Contrast                      | None        | 83.0 | 92.9  | 97.2 | 98.0   | None   | 33.0 | 62.0  | 71.8  | 76.7  |
| GeM + Cluster Contrast                | None        | 84.2 | 93.4  | 97.6 | 98.3   | None   | 33.6 | 63.3  | 73.3  | 78.0  |
| <b>Unsupervised Domain Adaptation</b> |             |      |       |      |        |        |      |       |       |       |
| SPCL [2]                              | MSMT17      | 77.5 | 89.7  | 96.1 | 97.6   | Market | 26.8 | 53.7  | 65.0  | 69.8  |
| SPCL + Cluster Contrast               | MSMT17      | 83.3 | 92.8  | 96.9 | 98.1   | Market | 35.1 | 62.4  | 75.3  | 79.9  |
| <b>Camera-aware Unsupervised</b>      |             |      |       |      |        |        |      |       |       |       |
| CAP [4]                               | None        | 79.2 | 91.4  | 96.3 | 97.7   | None   | 36.9 | 67.4  | 78.0  | 81.4  |
| ICE [1]                               | None        | 82.3 | 93.8  | 97.6 | 98.4   | None   | 38.9 | 70.2  | 80.5  | 84.4  |
| CAP + Cluster Contrast                | None        | 83.5 | 93.1  | 97.1 | 98.2   | None   | 40.1 | 69.8  | 80.2  | 84.0  |

### 1.1 Purely Unsupervised Re-ID

The Generalized-Mean (GeM) pooling [3] is a trainable pooling layer which is widely used to improve the image retrieval performance. By replacing the global average pooling with GeM pooling in Resnet-50 backbone, the Cluster Contrast further improves the unsupervised re-ID performance as shown in Table 1.

## 1.2 Unsupervised Domain Adaptation Re-ID

Our method can be easily generalized to unsupervised domain adaptation re-ID methods. We adopt the hybrid memory from SpCL [2] with our method, which combines the labeled source dataset with the pseudo-labeled target dataset as a unified cluster-level memory. As shown in Table 1, the Cluster Contrast method further boost SpCL’s performance.

## 1.3 Camera-aware Unsupervised Re-ID

To solve the large intra-ID variance caused by the change of camera views, the camera aware method [1, 4] uses the camera ID information to guide model training. Specifically, they further split the unsupervised clustering results by camera ID and use the camera-aware contrastive loss to pull the positive samples from the same camera closer and push the negative samples from different cameras away. To show the generalization ability of the Cluster Contrast method, we adopt the cluster-level memory into CAP [4] as an example. As show in Table 1, our method boost the CAP performance significantly, outperforming all unsupervised re-ID methods on MSMT17 dataset.

## References

1. Chen, H., Lagadec, B., Bremond, F.: Ice: Inter-instance contrastive encoding for unsupervised person re-identification. In: Proceedings of the IEEE/CVF International Conference on Computer Vision. pp. 14960–14969 (2021)
2. Ge, Y., Zhu, F., Chen, D., Zhao, R., Li, h.: Self-paced contrastive learning with hybrid memory for domain adaptive object re-id. In: Larochelle, H., Ranzato, M., Hadsell, R., Balcan, M.F., Lin, H. (eds.) Advances in Neural Information Processing Systems. vol. 33, pp. 11309–11321. Curran Associates, Inc. (2020), <https://proceedings.neurips.cc/paper/2020/file/821fa74b50ba3f7cba1e6c53e8fa6845-Paper.pdf>
3. Radenović, F., Tolias, G., Chum, O.: Fine-tuning cnn image retrieval with no human annotation. *IEEE transactions on pattern analysis and machine intelligence* **41**(7), 1655–1668 (2018)
4. Wang, M., Lai, B., Huang, J., Gong, X., Hua, X.S.: Camera-aware proxies for unsupervised person re-identification. In: AAAI. vol. 2, p. 4 (2021)
